# Supplementary material for: In Vitro and In Vivo Isolation and Characterization of Duvenhage Virus
Source: PubMed Central journal article supplement (PMC3359985; doi:10.1371/journal.ppat.1002682), 2012-05-24

Supplementary Figure S1: Amount of infected mouse neuroblastoma cells 24 hours after infection. N2a cells were infected (m.o.i.=10) with (a) DUVV-NL07, (b) RABV-PV and (c) SHBRV-18 and stained with anti-NP FITC antibody.

Figure S1a

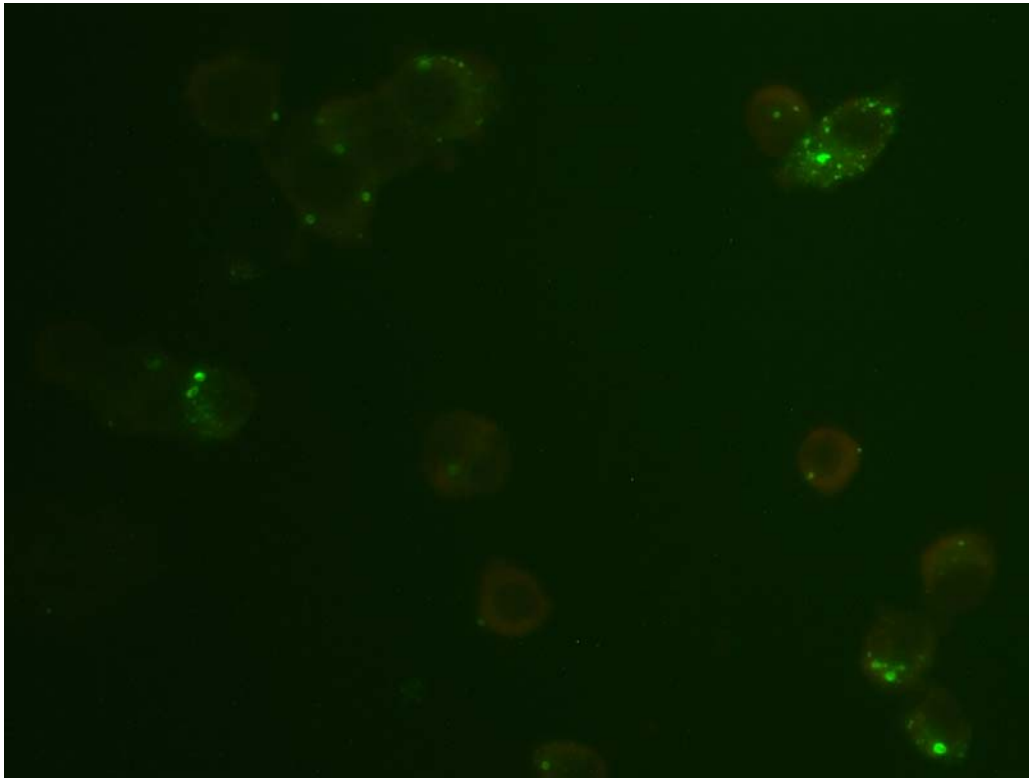

Figure S1b

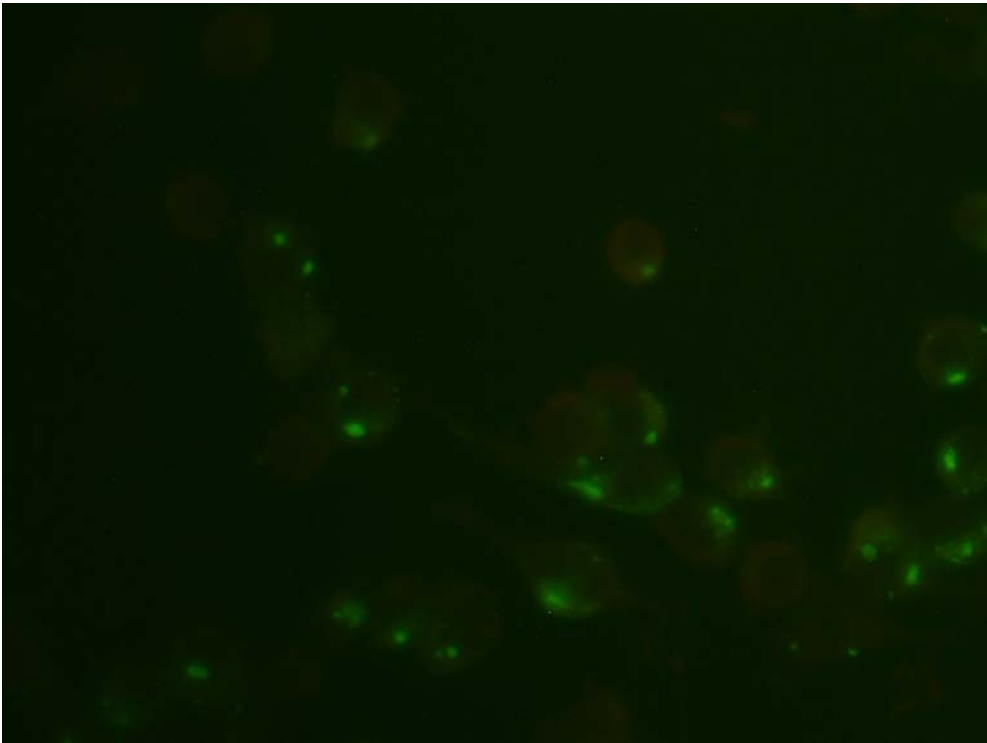

Figure S1c

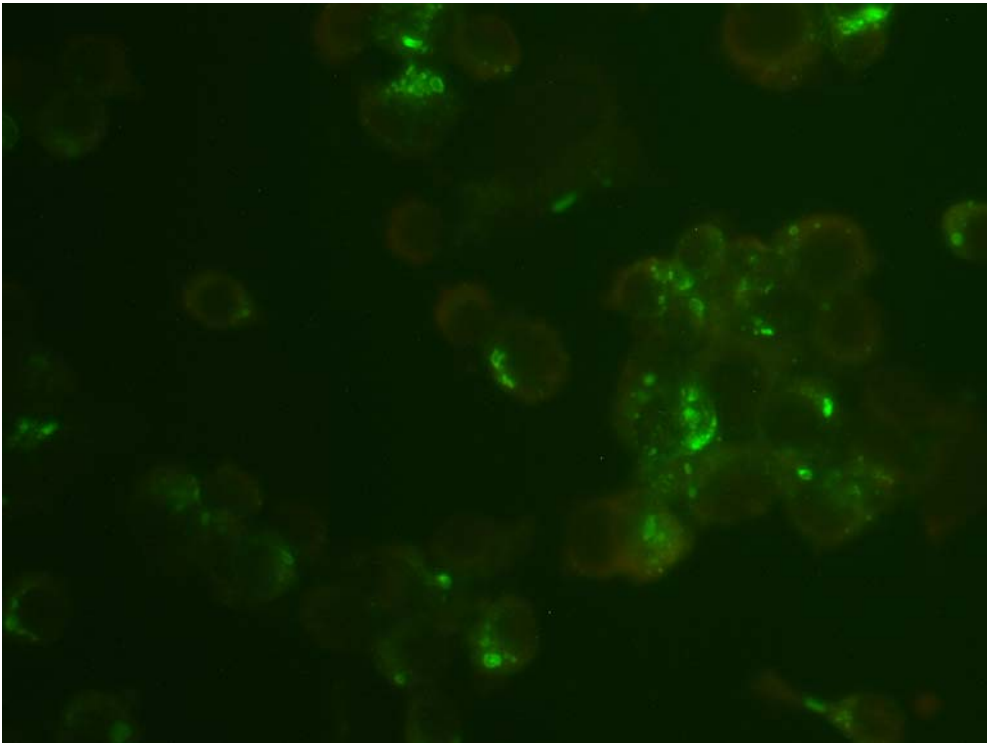

Supplement: ppat.1002682.s001.pdf [file ppat.1002682.s001.pdf]
