# Supplementary material for: In Vitro and In Vivo Isolation and Characterization of Duvenhage Virus
Source: PubMed Central journal article supplement (PMC3359985; doi:10.1371/journal.ppat.1002682), 2012-05-24

Supplementary Figure S3: Amount of infected human neuroblastoma cells seven days after infection. SK-N-SH cells were infected (m.o.i.=0.01) with (a) DUVV-NL07, (b) RABV-PV and (c) SHBRV-18 and stained with anti-NP FITC antibody.

Figure S3a

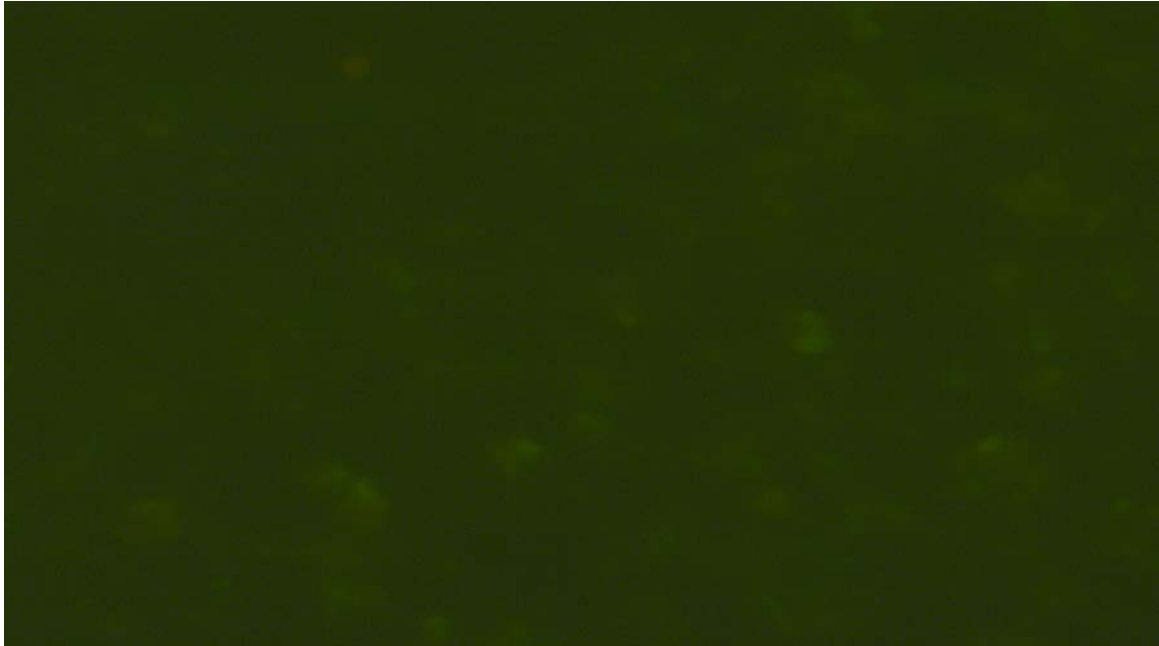

Figure S3b

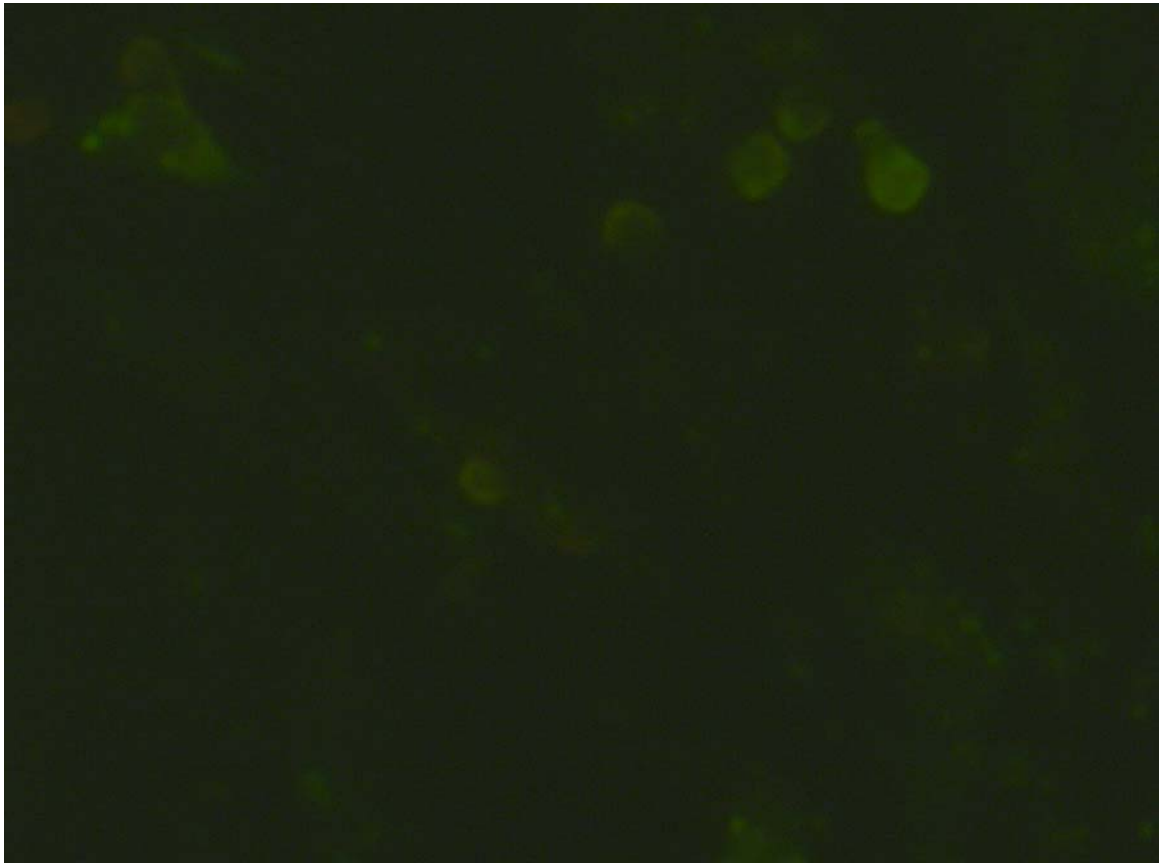

Figure S3c

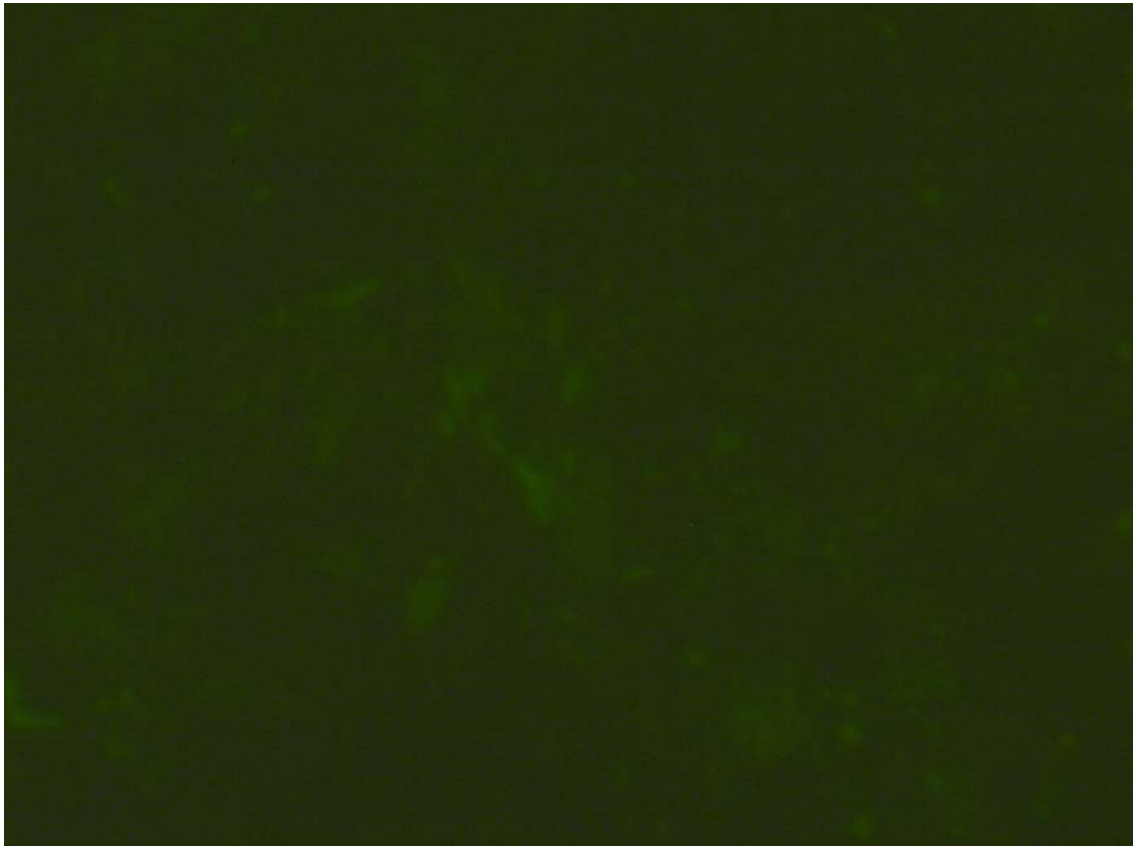

Supplement: ppat.1002682.s003.pdf [file ppat.1002682.s003.pdf]
