# Supplementary material for: In Vitro and In Vivo Isolation and Characterization of Duvenhage Virus
Source: PLOS journal article supplement (doi:10.1371/journal.ppat.1002682), 2012-05-24

Supplementary Figure S4: Seller's staining of brain sections from 8-week old mice. BALB/C mice were infected i.m. with  $10^6$  TCID<sub>50</sub> of DUVV-NL07 (S4a) or RABV-PV (S4b) or SHBRV-18 (S4c). Seller's staining was performed as described in "Laboratory Techniques in rabies" Forth Edition, World Health Organization, Geneva 1996.

Figure S4a

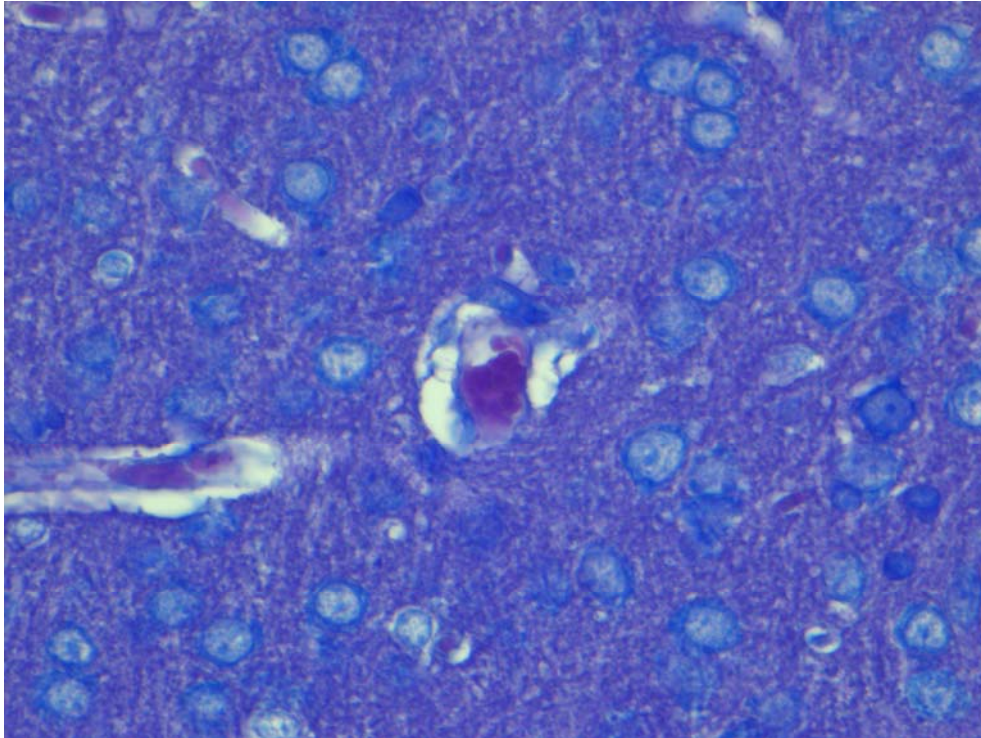

Figure S4b

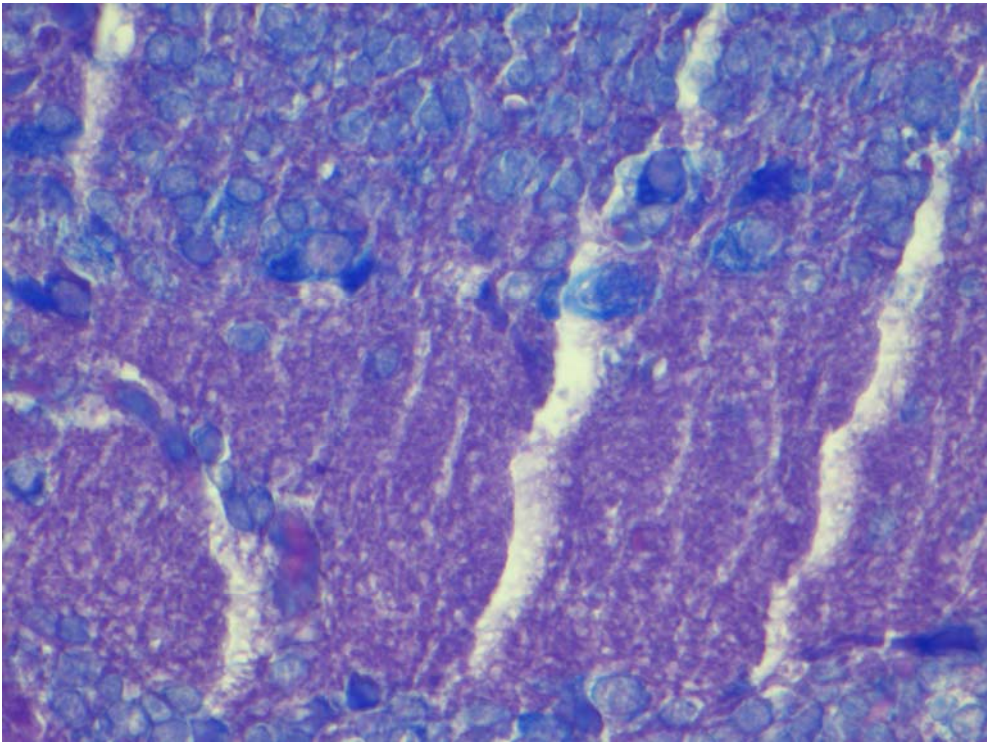

Figure S4c

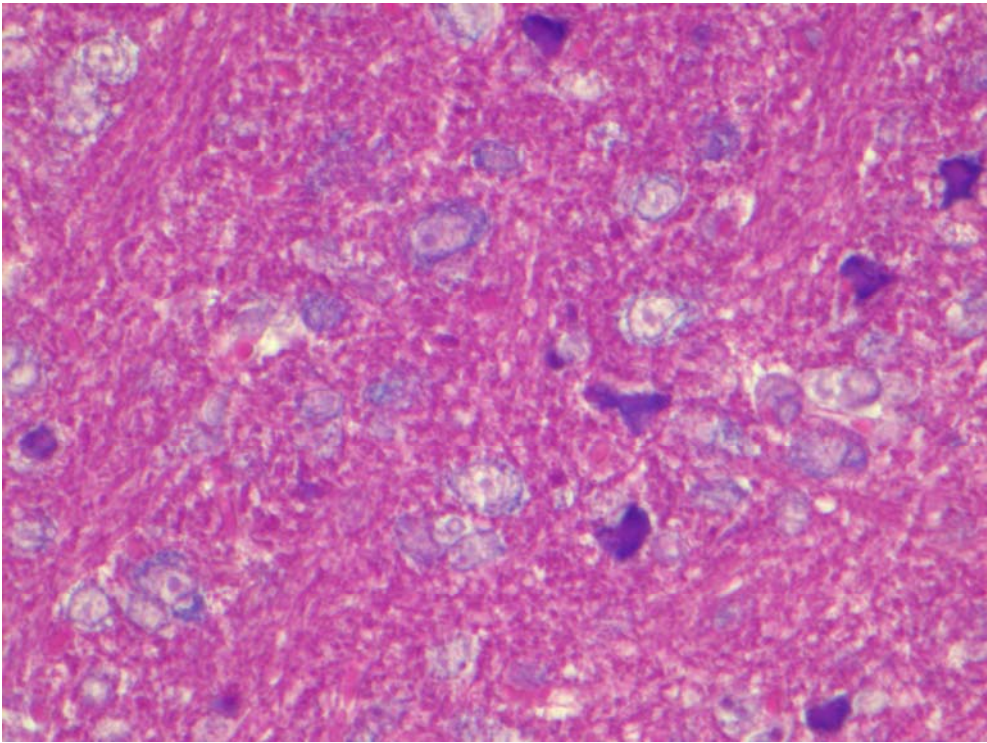

Supplement: S4 (10.1371/journal.ppat.1002682.s004) [file journal.ppat.1002682.s004]
